# Supplementary material for: Stomatal Development and Conductance of a Tropical Forage Legume Are Regulated by Elevated [CO2] Under Moderate Warming
Source: PubMed Central journal article supplement (PMC6554438; doi:10.3389/fpls.2019.00609), 2019-05-31
Supplement: Image_3.pdf [file Image_3.pdf]

## Supplementary Material

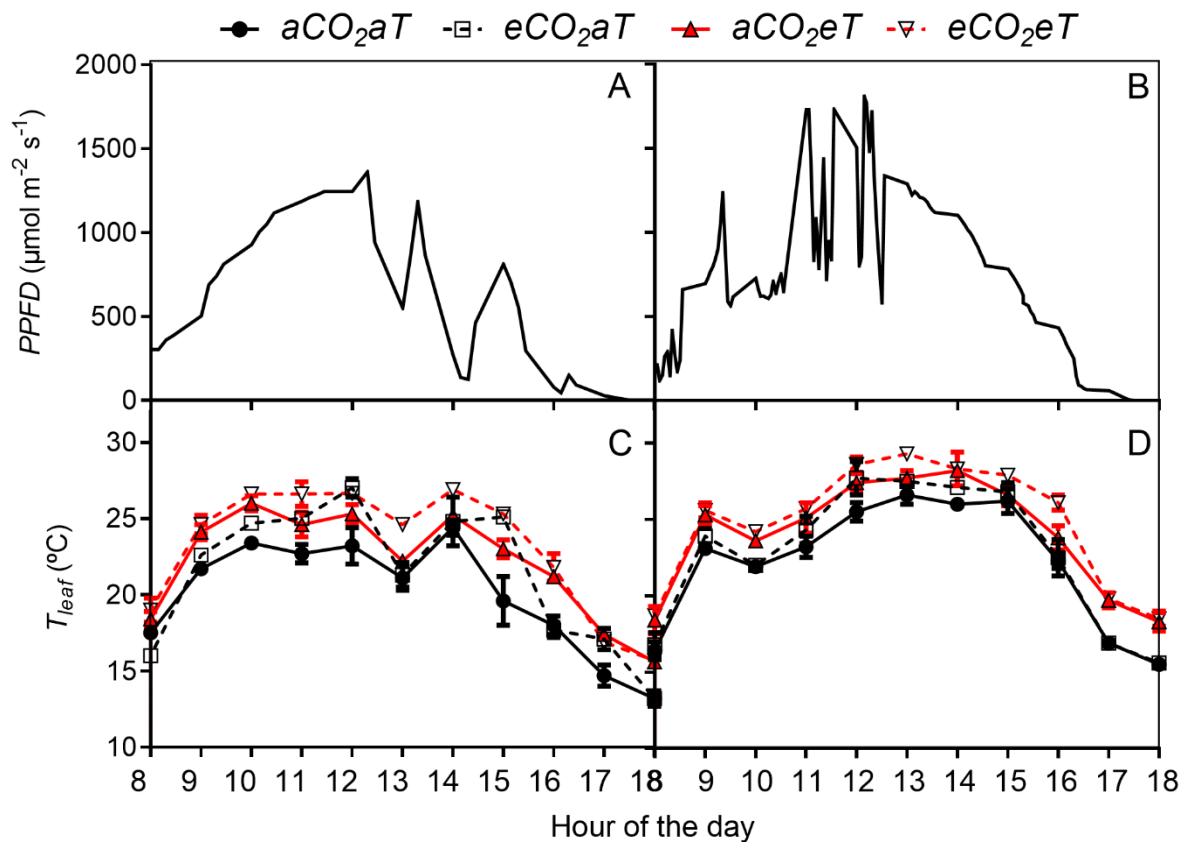

**Supplementary Figure 3.** Diurnal courses of leaf temperature ( $T_{leaf}$ ) measured directly on leaves of *Stylosanthes capitata* during two days. Left column (A, C) show diurnal course measured at 41<sup>st</sup> DOE, while right column (B, D) shows diurnal course at 54<sup>th</sup> DOE. PPFD = Photosynthetically active radiation. Treatments:  $aCO_2aT$  (ambient  $[CO_2]$  and ambient temperature),  $eCO_2aT$  (elevated  $[CO_2]$  and ambient temperature),  $aCO_2eT$  (ambient  $[CO_2]$  and elevated temperature) and  $eCO_2eT$  (elevated  $[CO_2]$  and elevated temperature). Stack bars indicate the standard error.
